# Supplementary material for: Association of State-Level Firearm-Related Deaths With Firearm Laws in Neighboring States
Source: PubMed Central journal article supplement (PMC9644258; doi:10.1001/jamanetworkopen.2022.40750), 2022-11-08
Supplement: jamanetwopen-e2240750-s001.pdf [file jamanetwopen-e2240750-s001.pdf]

## Supplementary Online Content

Liu Y, Siegel M, Sen B. Association of state-level firearm-related deaths with firearm laws in neighboring states. *JAMA Netw Open*. 2022;5(11):e2240750.  
doi:10.1001/jamanetworkopen.2022.40750

### **eMethods.** Statistical Analysis

**eFigure 1.** Spatial Autocorrelations for the Numbers of Firearm Laws of Interest Implemented and Total Firearm-Related Deaths

**eTable 1.** Effect Sizes of Within-State, Interstate, and Overall Association Between Laws of Interest and Total Firearm-Related Death Rate From the Spatial Durbin Model (SDM)

**eTable 2.** Variable Selection Based on Akaike Information Criterion (AIC) and Likelihood Ratio Test

**eTable 3.** Pairwise Correlation Matrix for All 9 Laws of Interest

**eTable 4.** Effect Sizes of Within-State, Interstate, and Overall Association Among Laws of Interest, the Index of Strictness of Firearm Regulation, State's Covariables, and Total Firearm-Related Death Rates

**eFigure 2.** Geographical Distribution of the Decrease of Predicted Total Effect of Total Firearm-Related Death Rate in 2019 of Each State if Alabama Hypothetically Had Had Permit-to-Purchase Law Implemented in 2019

**eFigure 3.** Decrease of Predicted Total Effect of Total Firearm-Related Death Rate in 2019 if All South-West Central States Had Had Permit-to-Purchase Law Implemented in 2019 Hypothetically

**eTable 5.** State Random-Effect SDM

**eTable 6.** SDM Using Contiguity Weight Matrix, Otherwise Same as the Final Model

**eTable 7.** Short- and Long-term Associations Among Laws of Interest, Index of Strictness of Firearm Regulation, and Total Firearm-Related Death Rates From a Dynamic Spatial Durbin Model Including a 1-Year Lagged Outcome Variable in the Model

**eTable 8.** Years of Implementation of 3 Selected Laws (2000-2019)

**eTable 9.** Number of States That Have Implemented the 9 Laws of Interest

This supplementary material has been provided by the authors to give readers additional information about their work.

## eMethods. Statistical Analysis

The spatial Durbin model (SDM) used in this analysis:

$$y_{nt} = \rho W y_{nt} + X_{nt} \beta + P_{nt} \gamma + W P_{nt} \theta + \mu_n + \tau_t + \epsilon_{nt} \quad (1)$$

where  $y$  denotes the rate of firearm death;  $\rho$  denotes spatial autoregressive coefficient;  $W$  denotes the spatial weight matrix;  $X$  denotes the state level variables including the deciles of the total number of firearm laws and other state level covariates;  $P$  denotes the laws of interest;  $\mu$  and  $\tau$  denote the state and year fixed effect, respectively, where the former controls for state-specific time-invariant confounders, and the latter accounts for confounders that change from year to year for the whole country. For the spatial weight matrix  $W$ , each cell of the matrix,  $w_{ij}$ , reflects the intensity of the spatial interaction between unit  $i$  and unit  $j$ . By convention,  $w_{ii} = 0$ , so that the  $W$  matrix has a zero diagonal.

For the  $k^{\text{th}}$  regressor of  $P$ , if we use  $M^{\bar{d}}$  to denote the mean diagonal element of matrix  $M$ , and the  $M^{\overline{\text{rsum}}}$  to denote the mean row sum of the non-diagonal elements of matrix  $M$ , then

The direct effects (DE):

$$DE = \{(I - \rho W)^{-1} \times (\gamma_k I + \theta_k W)\}^{\bar{d}}$$

The indirect effect (IE):

$$IE = \{(I - \rho W)^{-1} \times (\gamma_k I + \theta_k W)\}^{\overline{\text{rsum}}}$$

The total effect (TE) is the sum of DE and IE.

See: Elhorst, J. Paul. Spatial econometrics: from cross-sectional data to spatial panels. Heidelberg: Springer, 2014.

### Evaluation of the spatial correlation for the firearm laws of interests and the firearm death rate.

The total number of the firearm laws of interest was calculated and then the mean of each year was used to evaluate the spatial correlation. Moran's index was used from describe the spatial correlation (eFigure 1). Similar method was implemented for evaluating the spatial correlation of the rate of total firearm death.

### Missing values.

The "xsmle" generally cannot handle unbalanced panels. The WISQARS system suppressed the number of deaths if the counts were  $<10$ , which led to missing values for some state-years. Among our outcomes, firearm homicides (excluding legal intervention) had missing values for 8.3% of state-year observations, involving eight states. To achieve balanced panel data, for three states with relatively few observations missing (Maine with 6 missing observations; Delaware with 1 missing observation; Montana with 1 missing observation), the missing values were imputed as nine, while the remaining states (New Hampshire, Vermont, South Dakota, North Dakota, and Wyoming), all of which had 50% or more observations missing, were removed from the analysis of firearm homicide.

**eFigure 1.** Spatial Autocorrelations for the Numbers of Firearm Laws of Interest Implemented and Total Firearm-Related Deaths

A) Mean of total numbers of the laws of interest for each year and the Moran's I showing positive spatial correlation. P values for all Moran's I are  $<0.001$

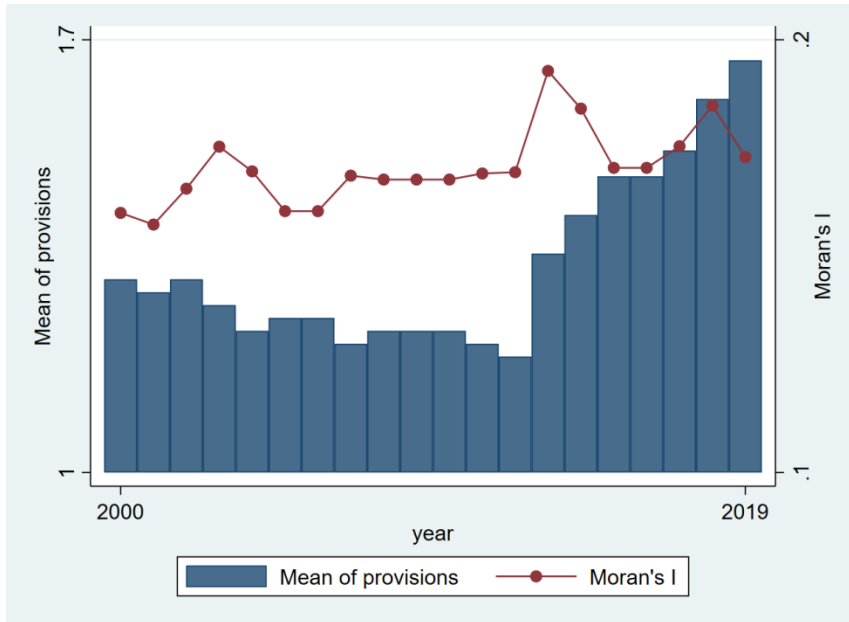

B) Mean of firearm death rate for each year and the Moran's I showing positive spatial correlation. P values for all Moran's I are  $<0.001$

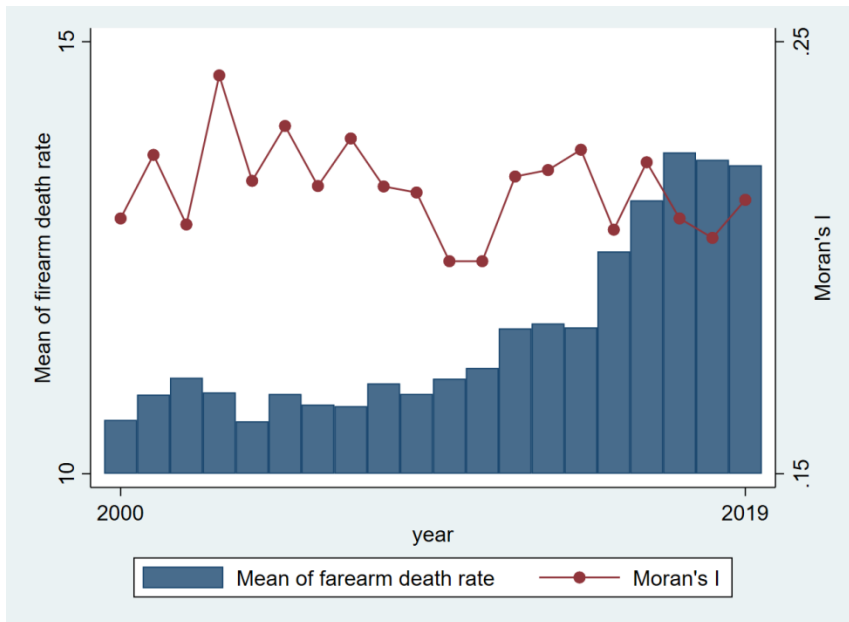

**eTable 1.** Effect Sizes of Within-State, Interstate, and Overall Association Between Laws of Interest and Total Firearm-Related Death Rate From the Spatial Durbin Model (SDM)

|                      | Within-state association |                 |         | Interstate association |                  |         | Overall association |                  |         |
|----------------------|--------------------------|-----------------|---------|------------------------|------------------|---------|---------------------|------------------|---------|
|                      | Effect size              | 95% CI          | P value | Effect size            | 95% CI           | P value | Effect size         | 95% CI           | P value |
| Background check     | -0.28                    | [-1.31 - 0.74]  | 0.588   | -6.17                  | [-13.37 - 1.03]  | 0.093   | -6.45               | [-13.66 - 0.76]  | 0.08    |
| Gun show             | 0.01                     | [-0.68 - 0.71]  | 0.968   | -9.36                  | [-18.73 - 0.00]  | 0.05    | -9.35               | [-18.94 - 0.24]  | 0.056   |
| Permit               | -2.42                    | [-3.35 - -1.49] | <0.001  | -16.72                 | [-25.87 - -7.58] | <0.001  | -19.14              | [-28.82 - -9.46] | <0.001  |
| Licensed dealer      | -0.45                    | [-1.26 - 0.35]  | 0.272   | -0.57                  | [-13.52 - 12.37] | 0.931   | -1.02               | [-14.20 - 12.15] | 0.879   |
| Records keeping      | -0.73                    | [-1.73 - 0.27]  | 0.15    | -8.54                  | [-15.49 - -1.59] | 0.016   | -9.27               | [-16.12 - -2.43] | 0.008   |
| Straw purchase       | 0.01                     | [-0.36 - 0.37]  | 0.977   | -4.62                  | [-20.47 - 11.23] | 0.568   | -4.62               | [-20.64 - 11.41] | 0.572   |
| May issue            | -0.4                     | [-0.93 - 0.13]  | 0.135   | -5.12                  | [-10.50 - 0.25]  | 0.062   | -5.53               | [-10.76 - -0.29] | 0.038   |
| Violence prohibition | -1.37                    | [-2.07 - -0.68] | <0.001  | -8.55                  | [-15.34 - -1.75] | 0.014   | -9.92               | [-17.11 - -2.73] | 0.007   |
| Relinquishment       | -0.63                    | [-2.35 - 1.09]  | 0.471   | 6.16                   | [-9.04 - 21.36]  | 0.427   | 5.53                | [-10.83 - 21.88] | 0.508   |

\*: Effect sizes are shown as per 100,000 population.

\*\*:. For all models, laws were added one at a time, with the following state-level time-varying variables—deciles of the total number of all firearm laws, population size, proportion aged  $\geq 65$  years, race, unemployment rate, poverty rate, the proportion aged  $\geq 25$  years without a high school diploma, the rates of crime against property, the percentage of state's population holding a hunting license, licensed gun dealer per 100,000 residents, and the vote share difference between the Republican and Democratic candidates in the presidential election (linear interpolated)—adjusted for, in addition to state and year fixed effect.

**eTable 2.** Variable Selection Based on Akaike Information Criterion (AIC) and Likelihood Ratio Test

|                       | AIC, one at a time | P value for LR test | AIC, stepwise‡ |
|-----------------------|--------------------|---------------------|----------------|
| Basic model           | 2944.293           |                     |                |
| Permit§               | 2595.523           | 0.0000              | 2595.523       |
| Relinquishment§       | 2635.941           | 0.0021              | 2585.296       |
| Violence prohibition§ | 2618.624           | 0.0000              | 2574.606       |
| Gun show§             | 2633.305           | 0.0006              | 2573.409*      |
| May issue§            | 2633.634           | 0.0007              | 2574.516**     |
| Straw purchase        | 2647.268           | 0.5991              | 2577.127**     |
| Records keeping†      | 2633.213           | 0.0005              | 2573.689**     |
| Background check†     | 2641.231           | 0.0293              | 2576.732**     |
| Licensed dealer       | 2645.665           | 0.2688              | 2575.268**     |
|                       |                    |                     |                |

§: selected for the final model

†: met the criteria for AIC and LR test, but was removed for colinearity

\*: Minimum AIC achieved

\*\* : AICs of the models including basic model, 4 laws selected, and the corresponding law

‡: An alternative approach that attempted to achieve minimum AIC is used for laws selection. From the basic model, each laws of interest is added one at a time, and the one that can achieve the minimum AIC is kept. This process is repeated until the minimum AIC was achieved.

**eTable 3.** Pairwise Correlation Matrix for All 9 Laws of Interest

|                      | Background check | Gun show | Permit | Licensed dealer | Records keeping | Straw purchase | May issue | Violence prohibition | relinquishment |
|----------------------|------------------|----------|--------|-----------------|-----------------|----------------|-----------|----------------------|----------------|
| Background check     | 1                |          |        |                 |                 |                |           |                      |                |
| Gun show             | 0.6678           | 1        |        |                 |                 |                |           |                      |                |
| Permit               | 0.255            | 0.2609   | 1      |                 |                 |                |           |                      |                |
| Licensed dealer      | 0.3765           | 0.4331   | 0.3437 | 1               |                 |                |           |                      |                |
| Records keeping      | 0.6227           | 0.712    | 0.4694 | 0.4691          | 1               |                |           |                      |                |
| Straw purchase       | 0.1726           | 0.3507   | 0.2542 | 0.4219          | 0.3549          | 1              |           |                      |                |
| May issue            | 0.3974           | 0.4255   | 0.5075 | 0.5317          | 0.4868          | 0.3738         | 1         |                      |                |
| Violence prohibition | 0.4224           | 0.391    | 0.142  | 0.2993          | 0.3948          | 0.5607         | 0.3448    | 1                    |                |
| relinquishment       | 0.2508           | 0.3783   | 0.3731 | 0.3872          | 0.3827          | 0.4337         | 0.2602    | 0.128                | 1              |

**eTable 4.** Effect Sizes of Within-State, Interstate, and Overall Association Among Laws of Interest, the Index of Strictness of Firearm Regulation, State’s Covariables, and Total Firearm-Related Death Rates

|                                                                                                | Within-state association |                        |                  | Interstate association |                         |              | Overall association |                         |              |
|------------------------------------------------------------------------------------------------|--------------------------|------------------------|------------------|------------------------|-------------------------|--------------|---------------------|-------------------------|--------------|
|                                                                                                | Effect size              | 95% CI                 | P value          | Effect size            | 95% CI                  | P value      | Effect size         | 95% CI                  | P value      |
| Permit*                                                                                        | <b>-1.84</b>             | <b>[-2.84 - -0.85]</b> | <b>&lt;0.001</b> | <b>-11.26</b>          | <b>[-18.73 - -3.79]</b> | <b>0.003</b> | <b>-13.1</b>        | <b>[-21.10 - -5.11]</b> | <b>0.001</b> |
| Relinquishment*                                                                                | -0.77                    | [-1.93 - 0.39]         | 0.191            | 6.05                   | [-1.59 - 13.69]         | 0.121        | 5.28                | [-2.93 - 13.49]         | 0.207        |
| Violence prohibition*                                                                          | <b>-0.81</b>             | <b>[-1.41 - -0.21]</b> | <b>0.008</b>     | <b>-5.3</b>            | <b>[-10.15 - -0.45]</b> | <b>0.032</b> | <b>-6.11</b>        | <b>[-11.20 - -1.03]</b> | <b>0.018</b> |
| Gun show*                                                                                      | 0.19                     | [-0.49 - 0.87]         | 0.582            | -3.36                  | [-8.42 - 1.70]          | 0.193        | -3.17               | [-8.36 - 2.01]          | 0.231        |
| Index of strictness of firearm regulation (deciles of number of total firearm laws)            | -0.11                    | [-0.26 - 0.04]         | 0.139            | 0.01                   | [-0.02 - 0.04]          | 0.503        | -0.1                | [-0.24 - 0.03]          | 0.142        |
| Population 65 years or older (%)                                                               | 0.27                     | [0.01 - 0.54]          | 0.044            | -0.02                  | [-0.08 - 0.04]          | 0.502        | 0.25                | [-0.01 - 0.51]          | 0.059        |
| Unemployment rate                                                                              | -0.1                     | [-0.31 - 0.12]         | 0.381            | 0.01                   | [-0.02 - 0.04]          | 0.62         | -0.09               | [-0.29 - 0.11]          | 0.387        |
| Property crime (per 100 population)                                                            | 0.94                     | [0.54 - 1.33]          | <0.001           | -0.08                  | [-0.27 - 0.11]          | 0.407        | 0.86                | [0.46 - 1.25]           | <0.001       |
| Poverty rate (%)                                                                               | -0.02                    | [-0.12 - 0.08]         | 0.699            | 0.00                   | [-0.01 - 0.01]          | 0.829        | -0.02               | [-0.11 - 0.08]          | 0.699        |
| White population (%)                                                                           | 0.18                     | [0.00 - 0.36]          | 0.045            | -0.02                  | [-0.06 - 0.03]          | 0.444        | 0.17                | [0.00 - 0.33]           | 0.047        |
| Population aged ≥25 years without high school diploma (%)                                      | 0.05                     | [-0.08 - 0.17]         | 0.44             | 0.00                   | [-0.02 - 0.01]          | 0.697        | 0.05                | [-0.07 - 0.16]          | 0.446        |
| Hunting license holder (%)                                                                     | 0.11                     | [0.01 - 0.21]          | 0.026            | -0.01                  | [-0.03 - 0.02]          | 0.465        | 0.11                | [0.01 - 0.20]           | 0.034        |
| Licensed gun dealer (per 100,000 residents)                                                    | -0.05                    | [-0.09 - -0.01]        | 0.028            | 0.00                   | [-0.01 - 0.01]          | 0.503        | -0.05               | [-0.09 - -0.00]         | 0.04         |
| Population density (logged)                                                                    | 1.04                     | [-3.70 - 5.79]         | 0.666            | -0.08                  | [-0.75 - 0.58]          | 0.805        | 0.96                | [-3.44 - 5.36]          | 0.669        |
| Vote share differences between the Republican and the Democratic presidential candidates (10%) | 0.34                     | [0.09 - 0.60]          | 0.009            | -0.03                  | [-0.10 - 0.05]          | 0.476        | 0.32                | [0.06 - 0.58]           | 0.016        |

#: Effect sizes are shown as per 100,000 population.

\*: Laws are selected by a stepwise approach to achieve minimal AIC

### Illustrative examples (eFigure 2 and 3).

This is an illustrative prediction to show the decrease of the total firearm death rate (total effect) if Alabama had had “Permit-to-purchase” law implemented in 2019, with all other factors constant. The map showed the decrease in total firearm death rate in each state between the predicted values (“total effect”) (permit=0 vs. permit=1 of the corresponding state in corresponding year). Colors are coded in quartiles; deeper blue indicates more decrease in predicted total firearm death rate.

**eFigure 2.** Geographical Distribution of the Decrease of Predicted Total Effect of Total Firearm-Related Death Rate in 2019 of Each State if Alabama Hypothetically Had Had Permit-to-Purchase Law Implemented in 2019

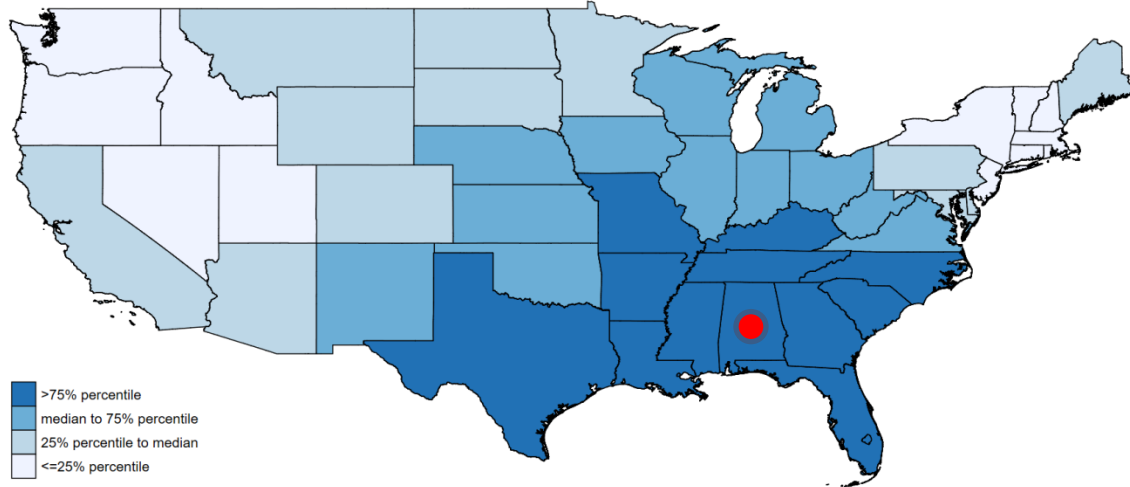



We then repeated this prediction to show the decrease of the total firearm death rate if all South-West Central (Census division) states (TX, AR, LA, and OK) had had “Permit-to-purchase” law implemented in 2019 hypothetically, with all other factors constant. Weighted by the inverse of the variance of the predicted rate, on average, there is a decrease of total firearm deaths (total effect) by 1.05 per 100,000 population in 2019 (95% CI: 0.16 – 1.94,  $p=0.022$ ) across all 48 contiguous states.

eFigure 3 showed the differences summarized at census division level.

**eFigure 3.** Decrease of Predicted Total Effect of Total Firearm-Related Death Rate in 2019 if All South-West Central States Had Had Permit-to-Purchase Law Implemented in 2019 Hypothetically

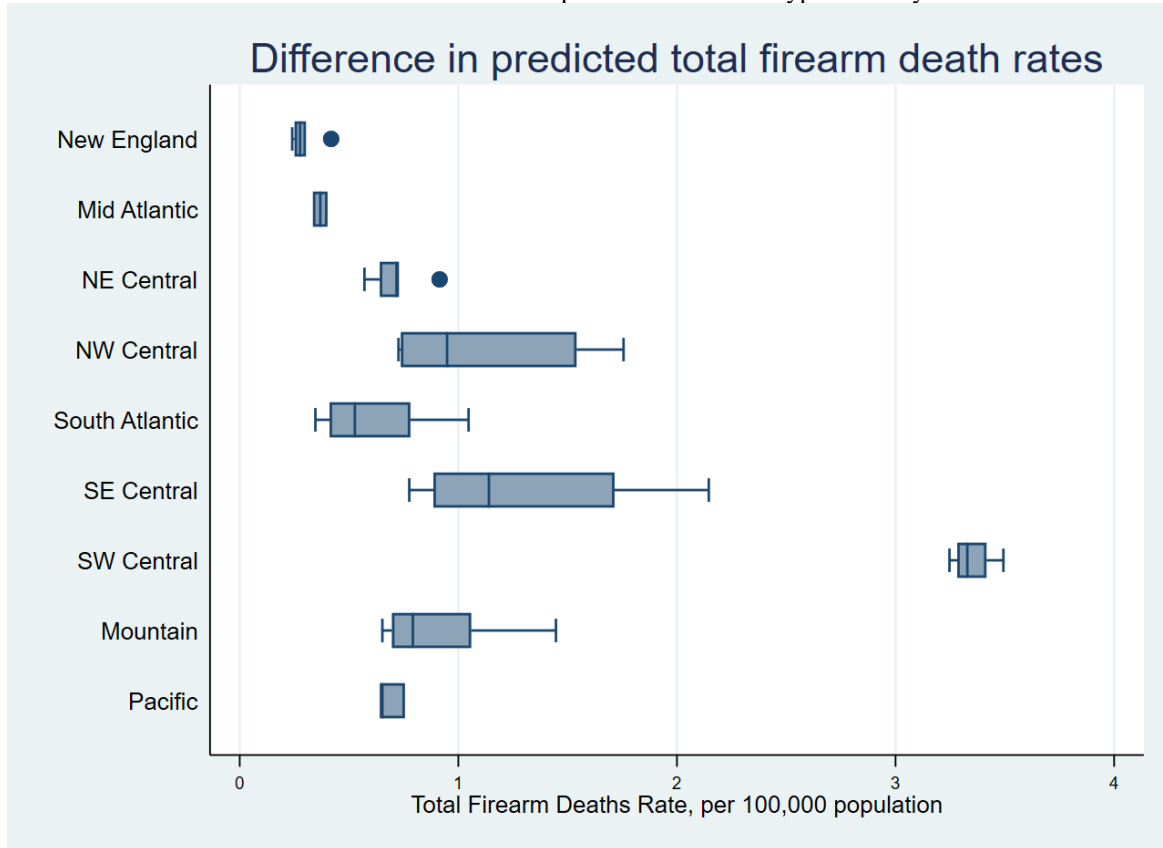

Results are summarized at the Census division level.

### Sensitivity analysis (eTables 5, 6, and 7)

The following 2 tables (eTable 5 and eTable 6) illustrate two sensitivity analyzes performed for the total firearm deaths to test the robustness of the results. First, the final model was repeated but using a contiguity weight matrix instead of the original inverse distance squared weight matrix. Second, a state random effect model with year- and census division- fixed effect (9 census divisions) using the same independent variables and the same weighted independent variables as the final model was built. Effect sizes and 95% CI are shown.

**eTable 5. State Random-Effect SDM**

|                                                                                                |                          | Effect size <sup>#</sup> |                     |
|------------------------------------------------------------------------------------------------|--------------------------|--------------------------|---------------------|
|                                                                                                | Within-state association | Interstate association   | Overall association |
| Permit                                                                                         | -2.108***                | -11.78***                | -13.89***           |
|                                                                                                | (-3.018 - -1.199)        | (-17.24 - -6.329)        | (-19.69 - -8.092)   |
| Relinquishment                                                                                 | -1.056**                 | 3.515                    | 2.459               |
|                                                                                                | (-2.032 - -0.0808)       | (-3.772 - 10.80)         | (-5.222 - 10.14)    |
| Violence prohibition                                                                           | -0.719*                  | -4.925**                 | -5.644**            |
|                                                                                                | (-1.508 - 0.0701)        | (-9.601 - -0.250)        | (-10.68 - -0.609)   |
| Gun show                                                                                       | 0.0188                   | -4.231*                  | -4.213*             |
|                                                                                                | (-0.612 - 0.649)         | (-8.843 - 0.380)         | (-8.948 - 0.523)    |
| May issue                                                                                      | -0.256                   | -0.415                   | -0.671              |
|                                                                                                | (-0.760 - 0.248)         | (-4.226 - 3.395)         | (-4.337 - 2.995)    |
| Index of strictness of firearm regulation (deciles of number of total firearm laws)            | -0.125                   | 0.0119                   | -0.113              |
|                                                                                                | (-0.294 - 0.0444)        | (-0.0226 - 0.0463)       | (-0.270 - 0.0439)   |
| Population 65 years or older (%)                                                               | 0.376**                  | -0.0339                  | 0.342**             |
|                                                                                                | (0.0813 - 0.671)         | (-0.118 - 0.0497)        | (0.0474 - 0.637)    |
| Unemployment rate                                                                              | -0.1                     | 0.0105                   | -0.0897             |
|                                                                                                | (-0.280 - 0.0798)        | (-0.0216 - 0.0427)       | (-0.252 - 0.0728)   |
| Property crime (per 100 population)                                                            | 1.043***                 | -0.106                   | 0.937***            |
|                                                                                                | (0.596 - 1.490)          | (-0.318 - 0.105)         | (0.512 - 1.361)     |
| Poverty rate (%)                                                                               | -0.0224                  | 0.00142                  | -0.0209             |
|                                                                                                | (-0.134 - 0.0897)        | (-0.0135 - 0.0164)       | (-0.124 - 0.0823)   |
| White population ( %)                                                                          | 0.0447                   | -0.00422                 | 0.0404              |
|                                                                                                | (-0.0980 - 0.187)        | (-0.0260 - 0.0176)       | (-0.0894 - 0.170)   |
| Population aged ≥25 years without high school diploma (%)                                      | 0.0499                   | -0.00542                 | 0.0445              |
|                                                                                                | (-0.0755 - 0.175)        | (-0.0251 - 0.0143)       | (-0.0685 - 0.157)   |
| Hunting license holder (%)                                                                     | 0.0828*                  | -0.00857                 | 0.0742*             |
|                                                                                                | (-0.0132 - 0.179)        | (-0.0290 - 0.0119)       | (-0.0129 - 0.161)   |
| Licensed gun dealer (per 100,000 residents)                                                    | -0.0367                  | 0.0032                   | -0.0335             |
|                                                                                                | (-0.0999 - 0.0264)       | (-0.00741 - 0.0138)      | (-0.0925 - 0.0254)  |
| Population density (logged)                                                                    | -0.159                   | 0.0201                   | -0.139              |
|                                                                                                | (-1.463 - 1.144)         | (-0.163 - 0.203)         | (-1.325 - 1.047)    |
| Vote share differences between the Republican and the Democratic presidential candidates (10%) | 0.345***                 | -0.0327                  | 0.312***            |
|                                                                                                | (0.107 - 0.582)          | (-0.104 - 0.0384)        | (0.0791 - 0.545)    |

. All laws and covariates included in the final model were also included in this model, in addition to a year fixed effect and a census division fixed effect

\*\*\* p<0.01, \*\* p<0.05, \* p<0.1

#: Effect sizes are shown as per 100,000 population.

**eTable 6.** SDM Using Contiguity Weight Matrix, Otherwise Same as the Final Model

|                                                                                     |                          | Effect size <sup>#</sup> |                      |
|-------------------------------------------------------------------------------------|--------------------------|--------------------------|----------------------|
|                                                                                     | Within-state association | Interstate association   | Overall association  |
| Permit                                                                              | -1.447***                | -3.792***                | -5.238***            |
|                                                                                     | (-2.523 - -0.370)        | (-5.844 - -1.739)        | (-7.982 - -2.494)    |
| Relinquishment                                                                      | -0.911*                  | -0.431                   | -1.342               |
|                                                                                     | (-1.844 - 0.0212)        | (-2.231 - 1.369)         | (-3.749 - 1.064)     |
| Violence prohibition                                                                | -0.752**                 | -1.695                   | -2.447*              |
|                                                                                     | (-1.415 - -0.0897)       | (-4.111 - 0.721)         | (-5.097 - 0.202)     |
| Gun show                                                                            | 0.0459                   | -1.427**                 | -1.382               |
|                                                                                     | (-0.637 - 0.729)         | (-2.794 - -0.0611)       | (-3.052 - 0.288)     |
| May issue                                                                           | -0.337                   | 0.0898                   | -0.247               |
|                                                                                     | (-0.813 - 0.140)         | (-0.849 - 1.028)         | (-1.135 - 0.642)     |
| Index of strictness of firearm regulation (deciles of number of total firearm laws) | -0.1                     | -0.00772                 | -0.108               |
|                                                                                     | (-0.261 - 0.0613)        | (-0.0247 - 0.00928)      | (-0.282 - 0.0664)    |
| Population 65 years or older (%)                                                    | 0.22                     | 0.019                    | 0.239                |
|                                                                                     | (-0.0478 - 0.488)        | (-0.0147 - 0.0526)       | (-0.0547 - 0.533)    |
| Unemployment rate                                                                   | -0.105                   | -0.0093                  | -0.115               |
|                                                                                     | (-0.308 - 0.0969)        | (-0.0314 - 0.0128)       | (-0.335 - 0.106)     |
| Property crime (per 100 population)                                                 | 0.913***                 | 0.077                    | 0.990***             |
|                                                                                     | (0.483 - 1.344)          | (-0.0169 - 0.171)        | (0.510 - 1.471)      |
| Poverty rate (%)                                                                    | -0.00439                 | -0.000736                | -0.00513             |
|                                                                                     | (-0.106 - 0.0970)        | (-0.0104 - 0.00892)      | (-0.115 - 0.105)     |
| White population (%)                                                                | 0.151*                   | 0.0124                   | 0.164*               |
|                                                                                     | (-0.0209 - 0.324)        | (-0.00827 - 0.0330)      | (-0.0228 - 0.350)    |
| Population aged ≥25 years without high school diploma (%)                           | 0.0294                   | 0.00265                  | 0.0321               |
|                                                                                     | (-0.105 - 0.163)         | (-0.0105 - 0.0158)       | (-0.114 - 0.178)     |
| Hunting license holder (%)                                                          | 0.113**                  | 0.00977                  | 0.123**              |
|                                                                                     | (0.0197 - 0.206)         | (-0.00463 - 0.0242)      | (0.0195 - 0.226)     |
| Licensed gun dealer (per 100,000 residents)                                         | -0.0468**                | -0.00382                 | -0.0506**            |
|                                                                                     | (-0.0932 - -0.000345)    | (-0.00969 - 0.00206)     | (-0.101 - -0.000443) |
| Population density (logged)                                                         | 1.099                    | 0.0889                   | 1.188                |
|                                                                                     | (-3.062 - 5.261)         | (-0.304 - 0.482)         | (-3.319 - 5.695)     |

|                                                                                                |                 |                    |                 |
|------------------------------------------------------------------------------------------------|-----------------|--------------------|-----------------|
| Vote share differences between the Republican and the Democratic presidential candidates (10%) | 0.411***        | 0.0346             | 0.445***        |
|                                                                                                | (0.137 - 0.684) | (-0.0104 - 0.0797) | (0.144 - 0.746) |

\*\*\* p<0.01, \*\* p<0.05, \* p<0.1

#: Effect sizes are shown as per 100,000 population.

**eTable 7.** Short- and Long-term Associations Among Laws of Interest, Index of Strictness of Firearm Regulation, and Total Firearm-Related Death Rates From a Dynamic Spatial Durbin Model Including a 1-Year Lagged Outcome Variable in the Model

|                                                                                     | Within-state association |                        |                  | Interstate association |                         |              | Overall association |                         |              |
|-------------------------------------------------------------------------------------|--------------------------|------------------------|------------------|------------------------|-------------------------|--------------|---------------------|-------------------------|--------------|
|                                                                                     | Effect size*             | 95% CI                 | P value          | Effect size*           | 95% CI                  | P value      | Effect size*        | 95% CI                  | P value      |
| Short term                                                                          |                          |                        |                  |                        |                         |              |                     |                         |              |
| Permit                                                                              | <b>-1.22</b>             | <b>[-1.88 - -0.56]</b> | <b>&lt;0.001</b> | <b>-6.3</b>            | <b>[-10.90 - -1.70]</b> | <b>0.007</b> | <b>-7.52</b>        | <b>[-12.46 - -2.57]</b> | <b>0.003</b> |
| Relinquishment                                                                      | -0.51                    | [-1.25 - 0.22]         | 0.169            | 4.81                   | [-0.76 - 10.39]         | 0.091        | 4.3                 | [-1.68 - 10.29]         | 0.159        |
| Violence prohibition                                                                | <b>-0.58</b>             | <b>[-1.04 - -0.13]</b> | <b>0.012</b>     | <b>-4.3</b>            | <b>[-7.20 - -1.40]</b>  | <b>0.004</b> | <b>-4.88</b>        | <b>[-8.03 - -1.73]</b>  | <b>0.002</b> |
| Gun show                                                                            | 0.03                     | [-0.36 - 0.42]         | 0.889            | -1.1                   | [-4.08 - 1.88]          | 0.468        | -1.07               | [-4.19 - 2.04]          | 0.499        |
| May issue                                                                           | -0.26                    | [-0.69 - 0.18]         | 0.248            | -0.37                  | [-2.83 - 2.10]          | 0.77         | -0.62               | [-2.95 - 1.70]          | 0.598        |
| Index of strictness of firearm regulation (deciles of number of total firearm laws) | -0.07                    | [-0.18 - 0.04]         | 0.186            | 0.01                   | [-0.01 - 0.04]          | 0.315        | -0.06               | [-0.16 - 0.03]          | 0.198        |
| Long term                                                                           |                          |                        |                  |                        |                         |              |                     |                         |              |
| Permit                                                                              | <b>-2.09</b>             | <b>[-3.25 - -0.94]</b> | <b>&lt;0.001</b> | <b>-9.77</b>           | <b>[-17.87 - -1.67]</b> | <b>0.018</b> | <b>-11.86</b>       | <b>[-20.53 - -3.19]</b> | <b>0.007</b> |
| Relinquishment                                                                      | -0.95                    | [-2.22 - 0.33]         | 0.145            | 7.73                   | [-1.31 - 16.77]         | 0.094        | 6.79                | [-2.93 - 16.50]         | 0.171        |
| Violence prohibition                                                                | <b>-0.99</b>             | <b>[-1.77 - -0.21]</b> | <b>0.013</b>     | <b>-6.62</b>           | <b>[-11.18 - -2.06]</b> | <b>0.004</b> | <b>-7.61</b>        | <b>[-12.54 - -2.68]</b> | <b>0.002</b> |
| Gun show                                                                            | 0.06                     | [-0.63 - 0.74]         | 0.875            | -1.81                  | [-6.67 - 3.04]          | 0.464        | -1.76               | [-6.83 - 3.31]          | 0.497        |
| May issue                                                                           | -0.45                    | [-1.23 - 0.33]         | 0.259            | -0.51                  | [-4.42 - 3.40]          | 0.798        | -0.96               | [-4.60 - 2.68]          | 0.606        |
| Index of strictness of firearm regulation (deciles of number of total firearm laws) | -0.13                    | [-0.32 - 0.06]         | 0.186            | 0.03                   | [-0.03 - 0.10]          | 0.307        | -0.1                | [-0.25 - 0.06]          | 0.212        |

Models were adjusted for the following state-level time-varying variables—population size, proportion aged  $\geq 65$  years, race, unemployment rate, poverty rate, the proportion aged  $\geq 25$  years without a high school diploma, the rates of crime against property, the percentage of state's population holding a hunting license, licensed gun dealer per 100,000 residents, and the vote share difference between the Republican and Democratic candidates in the presidential election (linear interpolated), in addition to state and year fixed effect.

\*: Effect sizes are shown as per 100,000 population.

**eTable 8.** Years of Implementation of 3 Selected Laws (2000-2019)

|       | Laws                                                                       |                                                                                                   |                                                                            |
|-------|----------------------------------------------------------------------------|---------------------------------------------------------------------------------------------------|----------------------------------------------------------------------------|
|       | Universal background checks required at point of purchase for all firearms | All private sellers and licensed dealers are required to keep and retain records of handgun sales | Background checks required for gun show handgun sales at point of purchase |
| State |                                                                            |                                                                                                   |                                                                            |
| CT    | Before 2000                                                                | Before 2000                                                                                       | Before 2000                                                                |
| CA    | Before 2000                                                                | Before 2000                                                                                       | Before 2000                                                                |
| CO    | 2013                                                                       | 2013                                                                                              | 2001                                                                       |
| DE    | 2013                                                                       | 2013                                                                                              | 2013                                                                       |
| NV    | 2017                                                                       | NONE                                                                                              | 2017                                                                       |
| NY    | 2013                                                                       | 2013                                                                                              | 2000                                                                       |
| OR    | 2015                                                                       | 2015                                                                                              | 2000                                                                       |
| WA    | 2014                                                                       | 2014                                                                                              | 2014                                                                       |
| IL    | NONE                                                                       | Before 2000                                                                                       | 2005                                                                       |
| VT    | 2018                                                                       | NONE                                                                                              | 2018                                                                       |
| NM    | 2019                                                                       | NONE                                                                                              | 2019                                                                       |
| NJ    | NONE                                                                       | Before 2000                                                                                       | 2018                                                                       |

**eTable 9.** Number of States That Have Implemented the 9 Laws of Interest

|                      | 2000     | 2010     | 2019     |
|----------------------|----------|----------|----------|
| Background check     | 3 (6%)   | 3 (6%)   | 11 (23%) |
| Gun show             | 7 (15%)  | 9 (19%)  | 15 (31%) |
| Permit               | 4 (8%)   | 4 (8%)   | 6 (13%)  |
| Licensed dealer      | 16 (33%) | 15 (31%) | 14 (29%) |
| Records keeping      | 8 (17%)  | 8 (17%)  | 13 (27%) |
| Straw purchase       | 2 (4%)   | 4 (8%)   | 4 (8%)   |
| May issue            | 20 (42%) | 12 (25%) | 8 (17%)  |
| Violence prohibition | 1 (2%)   | 1 (2%)   | 3 (6%)   |
| Relinquishment       | 2 (4%)   | 3 (6%)   | 6 (13%)  |
